# Supplementary material for: Responses of the Photosynthetic Electron Transport Reactions Stimulate the Oxidation of the Reaction Center Chlorophyll of Photosystem I, P700, under Drought and High Temperatures in Rice
Source: MDPI journal article supplement (doi:10.3390/ijms20092068), 2019-04-26
Supplement: s1 [file s1]

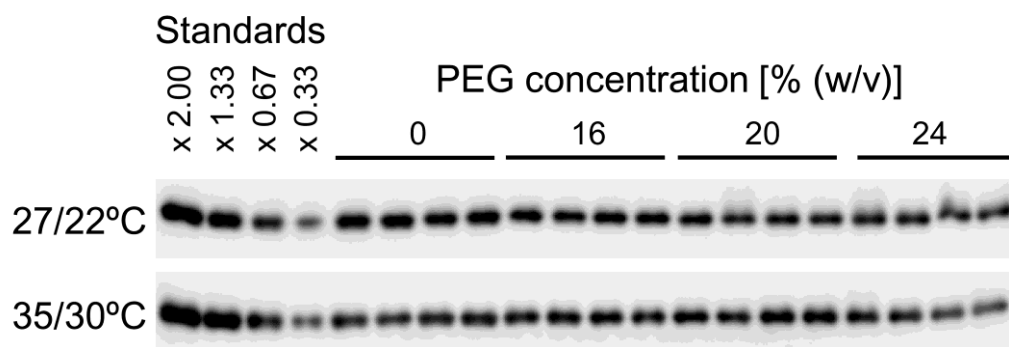

**Figure S1.** Immunological detection of cytochrome *f* after drought stress treatment under two different temperature conditions in rice. Approximately 60 days after germination, hydroponically grown plants were drought-stressed using culture solutions containing PEG at 0, 16, 20, 24% (w/v) for two days under an irradiance of 450  $\mu\text{mol photon m}^{-2} \text{ s}^{-1}$  and a day/night air-temperatures of 27/22°C or 35/30°C, followed by Western blotting using polyclonal-monospecific antibodies against cytochrome *f*. An aliquot of each SDS-treated sample, corresponding to a leaf fresh weight of 0.09 mg, were loaded onto a gel. To generate a calibration curve (designated as Standards in the figure), 0.33- to 2.00-fold volume of the sample prepared from the PEG-untreated plants at 27/22°C were loaded onto a gel.
